# Supplementary material for: Derived Environmental Impacts of Organic Fairtrade Cocoa (Peru) Compared to Its Conventional Equivalent (Ivory Coast) through Life-Cycle Assessment in the Basque Country
Source: MDPI journal article supplement (doi:10.3390/su16020493), 2024-01-05
Supplement: s1 [file s1]

Supporting Information for:

**Derived Environmental Impacts of Organic Fairtrade  
Cocoa (Peru) Compared to Its Conventional Equivalent  
(Ivory Coast) through Life-Cycle Assessment in the  
Basque Country**

**Blanca López del Amo <sup>1,2</sup> and Ortzi Akizu-Gardoki <sup>1,\*</sup>**

<sup>1</sup> Life Cycle Thinking Group (LCTG), Department of Graphic Design and Engineering Projects, University of the Basque Country (UPV/EHU), Plaza Ingeniero Torres Quevedo 1, 48013 Bilbao, Spain; bclopez@bculinary.com

<sup>2</sup> Basque Culinary Center Innovation (BCC Innovation), Technology Center in Gastronomy, Mondragon Unibertsitatea, Paseo Juan Avelino Barriola 101, 20099 Donostia, Spain

\* Correspondence: ortzi.akizu@ehu.eus

**Table S1.** Inventory data for Ethiquable's Organic Agriculture and Fairtrade (OA&FT) Chocolate (72% cocoa).

| <b>OA&amp;FT CHOCOLATE (1 kg)</b>                      |               |                   |
|--------------------------------------------------------|---------------|-------------------|
| <b>Description</b>                                     | <b>Amount</b> | <b>Unit</b>       |
| <b>INPUTS DURING INGREDIENTS PRODUCTION STAGE</b>      |               |                   |
| Carbon dioxide, in air                                 | 1.843003897   | kg                |
| Compost                                                | 2.7           | kg                |
| Energy, gross calorific value, in biomass              | 23.61385991   | MJ                |
| Entomopathogenic virus                                 | 1.00E-03      | kg                |
| Establishing orchard                                   | 0.013154667   | Item(s)           |
| Fruit tree seedling, for planting                      | 0.013154667   | Item(s)           |
| Irrigation                                             | 1.522721425   | m <sup>3</sup>    |
| Occupation, permanent crop, irrigated                  | 22.611744     | m <sup>2</sup> *a |
| Planting tree                                          | 0.013154667   | Item(s)           |
| Transformation, from permanent crop, irrigated         | 0.375800373   | m <sup>2</sup>    |
| Transformation, to permanent crop, irrigated           | 0.375800373   | m <sup>2</sup>    |
| Transport, tractor and trailer, agricultural           | 0.001991916   | t*km              |
| Transport, tractor and trailer, agricultural           | 8.10E-06      | t*km              |
| Carbon dioxide, in air                                 | 1.843003897   | kg                |
| Packaging, for fertilisers                             | 0.1           | kg                |
| Sheet rolling, aluminium                               | 0.0073        | kg                |
| White lined chipboard carton                           | 0.08          | kg                |
| Packaging film, low density polyethylene               | 0.005         | kg                |
| Sheet rolling, aluminium                               | 0.0073        | kg                |
| White lined chipboard carton                           | 0.08          | kg                |
| 0:OA&FT_RAW_CANE_SUGAR                                 | 0.28          | kg                |
|                                                        |               |                   |
| <b>INPUTS DURING PROCESSING STAGE</b>                  |               |                   |
| Building, hall, steel construction                     | 4.09E-07      | m <sup>2</sup>    |
| Electricity, medium voltage                            | 0.1614        | kWh               |
| Folding boxboard carton                                | 0.006         | kg                |
| Natural gas liquids                                    | 0.0378        | kg                |
| Water, PE                                              | 0.0048        | m <sup>3</sup>    |
| Wood pellet, measured as dry mass                      | 0.008         | kg                |
| Electricity, medium voltage                            | 0.18          | kWh               |
| Building, hall, steel construction                     | 4.09E-07      | m <sup>2</sup>    |
| Electricity, medium voltage, renewable energy products | 0.64971       | kWh               |
| Natural gas liquids                                    | 0.528         | kg                |

|                                                               |            |                |
|---------------------------------------------------------------|------------|----------------|
| Water, PE                                                     | 0.01397    | m <sup>3</sup> |
| <b>Transport (Factory and Retail Distribution)</b>            |            |                |
| Transport, freight, lorry, unspecified                        | 759        | kg*km          |
| Transport, freight, sea, container ship                       | 10002.35   | kg*km          |
| Transport, freight, lorry with refrigeration machine, cooling | 369        | kg*km          |
| <b>OUTPUTS IN INGREDIENTS PRODUCTION PHASE</b>                |            |                |
| 1.1_INGREDIENTS_DRY_COCOA_BEANS                               | 1          | kg             |
| Waste wood, untreated                                         | 0.04564224 | kg             |
| Waste wood, untreated                                         | 4.14E-04   | kg             |
| Waste wood, untreated                                         | 0.01591738 | kg             |
| Waste wood, untreated                                         | 0.07203151 | kg             |
| Waste wood, untreated                                         | 0.00566717 | kg             |
| Waste wood, untreated                                         | 0.00240473 | kg             |
| Waste wood, untreated                                         | 0.00380168 | kg             |
| Waste wood, untreated                                         | 0.60553339 | kg             |
| Water                                                         | 0.74118655 | m <sup>3</sup> |
| Water                                                         | 0.15631093 | m <sup>3</sup> |
| Water                                                         | 0.62522811 | m <sup>3</sup> |
| 2_PACKAGING_MAT_AUX_TRANSPORT                                 | 1          | kg             |
| Aluminium waste                                               | 0.0025     | kg             |
| Carton waste                                                  | 0.0025     | kg             |
| Packaging waste, plastic                                      | 0.02       | kg             |
| Packaging waste, plastic                                      | 0.0025     | kg             |
| <b>OUTPUTS IN PROCESSING PHASE</b>                            |            |                |
| 3.1_COCOA_PASTE_FABRICATION                                   | 0.6        | kg             |
| Biowaste                                                      | 3.28       | kg             |
| 3.3_COCOA_BUTTER_FABRICATION                                  | 1          | kg             |
| 3_CHOCOLATE_FABRICATION                                       | 1          | kg             |
| 4_TRANSPORT_FOR_DISTRIBUTION                                  | 1          | kg             |

**Table S2.** Inventory data Conventional Agriculture (CA) Chocolate (72% cocoa).

| <b>CA CHOCOLATE (1 kg)</b>                        |               |             |
|---------------------------------------------------|---------------|-------------|
| <b>Description</b>                                | <b>Amount</b> | <b>Unit</b> |
| <b>INPUTS DURING INGREDIENTS PRODUCTION STAGE</b> |               |             |
| Acetamide-anillide-compound, unspecified          | 0.007593973   | kg          |
| Ammonia, anhydrous, liquid                        | 7.83E-04      | kg          |
| Ammonia, anhydrous, liquid                        | 3.54E-04      | kg          |
| Ammonia, anhydrous, liquid                        | 3.71E-05      | kg          |
| Ammonia, anhydrous, liquid                        | 0.003920863   | kg          |

|                                           |             |         |
|-------------------------------------------|-------------|---------|
| Ammonia, anhydrous, liquid                | 1.82E-04    | kg      |
| Ammonia, anhydrous, liquid                | 0.00136256  | kg      |
| Ammonia, anhydrous, liquid                | 3.61E-04    | kg      |
| Ammonium nitrate                          | 0.001572483 | kg      |
| Ammonium nitrate                          | 0.004102927 | kg      |
| Ammonium nitrate                          | 0.001208623 | kg      |
| Ammonium nitrate                          | 0.00226734  | kg      |
| Ammonium sulfate                          | 0.004011526 | kg      |
| Ammonium sulfate                          | 0.001231    | kg      |
| Carbon dioxide, in air                    | 1.843003897 | kg      |
| Copper oxide                              | 0.007593973 | kg      |
| Cyclic N-compound                         | 3.67E-04    | kg      |
| Energy, gross calorific value, in biomass | 23.61385991 | MJ      |
| Establishing orchard                      | 0.013154667 | Item(s) |
| Fruit tree seedling, for planting         | 0.013154667 | Item(s) |
| Inorganic nitrogen fertiliser, as N       | 9.50E-07    | kg      |
| Inorganic nitrogen fertiliser, as N       | 2.75E-05    | kg      |
| Inorganic nitrogen fertiliser, as N       | 3.71E-04    | kg      |
| Inorganic nitrogen fertiliser, as N       | 6.51E-05    | kg      |
| Inorganic nitrogen fertiliser, as N       | 1.77E-04    | kg      |
| Inorganic nitrogen fertiliser, as N       | 9.78E-06    | kg      |
| Inorganic nitrogen fertiliser, as N       | 2.26E-04    | kg      |
| Inorganic nitrogen fertiliser, as N       | 0.003484682 | kg      |
| Inorganic nitrogen fertiliser, as N       | 6.21E-05    | kg      |
| Inorganic nitrogen fertiliser, as N       | 6.49E-05    | kg      |
| Inorganic nitrogen fertiliser, as N       | 1.67E-04    | kg      |
| Inorganic nitrogen fertiliser, as N       | 7.12E-06    | kg      |
| Inorganic nitrogen fertiliser, as N       | 2.64E-05    | kg      |
| Inorganic nitrogen fertiliser, as N       | 1.71E-05    | kg      |
| Inorganic nitrogen fertiliser, as N       | 2.23E-04    | kg      |
| Inorganic nitrogen fertiliser, as N       | 2.38E-05    | kg      |
| Inorganic nitrogen fertiliser, as N       | 2.53E-04    | kg      |
| Inorganic nitrogen fertiliser, as N       | 5.18E-05    | kg      |
| Inorganic nitrogen fertiliser, as N       | 0.001828455 | kg      |
| Inorganic nitrogen fertiliser, as N       | 0.002404087 | kg      |
| Inorganic nitrogen fertiliser, as N       | 1.37E-04    | kg      |
| Inorganic nitrogen fertiliser, as N       | 1.98E-04    | kg      |
| Inorganic nitrogen fertiliser, as N       | 1.01E-04    | kg      |
| Inorganic nitrogen fertiliser, as N       | 6.21E-04    | kg      |
| Inorganic nitrogen fertiliser, as N       | 0.015262221 | kg      |
| Inorganic nitrogen fertiliser, as N       | 0.002009885 | kg      |

|                                          |             |    |
|------------------------------------------|-------------|----|
| Inorganic nitrogen fertiliser, as N      | 6.66E-05    | kg |
| Inorganic nitrogen fertiliser, as N      | 2.84E-04    | kg |
| Inorganic phosphorus fertiliser, as P2O5 | 5.69E-04    | kg |
| Inorganic phosphorus fertiliser, as P2O5 | 4.52E-06    | kg |
| Inorganic phosphorus fertiliser, as P2O5 | 1.90E-04    | kg |
| Inorganic phosphorus fertiliser, as P2O5 | 3.18E-04    | kg |
| Inorganic phosphorus fertiliser, as P2O5 | 7.11E-04    | kg |
| Inorganic phosphorus fertiliser, as P2O5 | 9.39E-04    | kg |
| Inorganic phosphorus fertiliser, as P2O5 | 8.34E-05    | kg |
| Inorganic phosphorus fertiliser, as P2O5 | 6.44E-04    | kg |
| Inorganic phosphorus fertiliser, as P2O5 | 0.004393367 | kg |
| Inorganic phosphorus fertiliser, as P2O5 | 2.11E-05    | kg |
| Inorganic phosphorus fertiliser, as P2O5 | 6.97E-04    | kg |
| Inorganic phosphorus fertiliser, as P2O5 | 0.041077629 | kg |
| Inorganic phosphorus fertiliser, as P2O5 | 2.07E-05    | kg |
| Inorganic phosphorus fertiliser, as P2O5 | 3.40E-04    | kg |
| Inorganic phosphorus fertiliser, as P2O5 | 2.95E-04    | kg |
| Inorganic phosphorus fertiliser, as P2O5 | 5.48E-06    | kg |
| Inorganic phosphorus fertiliser, as P2O5 | 1.47E-04    | kg |
| Inorganic phosphorus fertiliser, as P2O5 | 3.77E-05    | kg |
| Inorganic phosphorus fertiliser, as P2O5 | 0.004458521 | kg |
| Inorganic phosphorus fertiliser, as P2O5 | 1.02E-04    | kg |
| Inorganic phosphorus fertiliser, as P2O5 | 6.54E-04    | kg |
| Inorganic phosphorus fertiliser, as P2O5 | 5.48E-04    | kg |
| Inorganic phosphorus fertiliser, as P2O5 | 0.002900409 | kg |
| Inorganic phosphorus fertiliser, as P2O5 | 2.33E-04    | kg |
| Inorganic phosphorus fertiliser, as P2O5 | 0.00596244  | kg |
| Inorganic phosphorus fertiliser, as P2O5 | 4.48E-04    | kg |
| Inorganic phosphorus fertiliser, as P2O5 | 1.18E-04    | kg |
| Inorganic phosphorus fertiliser, as P2O5 | 0.010525606 | kg |
| Inorganic potassium fertiliser, as K2O   | 4.52E-05    | kg |
| Inorganic potassium fertiliser, as K2O   | 1.24E-04    | kg |
| Inorganic potassium fertiliser, as K2O   | 9.14E-05    | kg |
| Inorganic potassium fertiliser, as K2O   | 0.001133272 | kg |
| Inorganic potassium fertiliser, as K2O   | 2.69E-04    | kg |
| Inorganic potassium fertiliser, as K2O   | 6.17E-05    | kg |
| Inorganic potassium fertiliser, as K2O   | 1.95E-05    | kg |
| Inorganic potassium fertiliser, as K2O   | 1.03E-05    | kg |
| Inorganic potassium fertiliser, as K2O   | 9.12E-06    | kg |
| Inorganic potassium fertiliser, as K2O   | 7.36E-07    | kg |
| Inorganic potassium fertiliser, as K2O   | 0.001012471 | kg |

|                                                     |             |                   |
|-----------------------------------------------------|-------------|-------------------|
| Inorganic potassium fertiliser, as K <sub>2</sub> O | 8.11E-05    | kg                |
| Inorganic potassium fertiliser, as K <sub>2</sub> O | 6.97E-06    | kg                |
| Inorganic potassium fertiliser, as K <sub>2</sub> O | 3.13E-05    | kg                |
| Inorganic potassium fertiliser, as K <sub>2</sub> O | 2.63E-05    | kg                |
| Inorganic potassium fertiliser, as K <sub>2</sub> O | 3.00E-05    | kg                |
| Inorganic potassium fertiliser, as K <sub>2</sub> O | 9.17E-05    | kg                |
| Inorganic potassium fertiliser, as K <sub>2</sub> O | 5.65E-05    | kg                |
| Inorganic potassium fertiliser, as K <sub>2</sub> O | 5.38E-04    | kg                |
| Inorganic potassium fertiliser, as K <sub>2</sub> O | 2.43E-05    | kg                |
| Inorganic potassium fertiliser, as K <sub>2</sub> O | 2.62E-05    | kg                |
| Inorganic potassium fertiliser, as K <sub>2</sub> O | 0.001898197 | kg                |
| Inorganic potassium fertiliser, as K <sub>2</sub> O | 2.48E-05    | kg                |
| Inorganic potassium fertiliser, as K <sub>2</sub> O | 6.60E-05    | kg                |
| Inorganic potassium fertiliser, as K <sub>2</sub> O | 3.56E-06    | kg                |
| Inorganic potassium fertiliser, as K <sub>2</sub> O | 0.007325551 | kg                |
| Inorganic potassium fertiliser, as K <sub>2</sub> O | 7.00E-04    | kg                |
| Inorganic potassium fertiliser, as K <sub>2</sub> O | 1.63E-05    | kg                |
| Irrigation                                          | 1.522721425 | m <sup>3</sup>    |
| Occupation, permanent crop, irrigated               | 18.84312136 | m <sup>2</sup> *a |
| Organophosphorus-compound, unspecified              | 8.53E-05    | kg                |
| Packaging, for fertilisers                          | 0.41301913  | kg                |
| Packaging, for pesticides                           | 0.031279894 | kg                |
| Phosphate rock, beneficiated                        | 0.019050115 | kg                |
| Phosphate rock, beneficiated                        | 8.63E-05    | kg                |
| Phosphate rock, beneficiated                        | 2.53E-04    | kg                |
| Phosphate rock, beneficiated                        | 2.53E-04    | kg                |
| Planting tree                                       | 0.013154667 | Item(s)           |
| Potassium chloride                                  | 0.005403356 | kg                |
| Potassium chloride                                  | 0.065153729 | kg                |
| Potassium sulfate                                   | 0.008378178 | kg                |
| Potassium sulfate                                   | 0.001764895 | kg                |
| Transformation, from permanent crop, irrigated      | 0.375800373 | m <sup>2</sup>    |
| Transformation, to permanent crop, irrigated        | 0.45096     | m <sup>2</sup>    |
| Transport, tractor and trailer, agricultural        | 8.10E-06    | t*km              |
| Transport, tractor and trailer, agricultural        | 0.001991916 | t*km              |
| Urea                                                | 0.002576436 | kg                |
| Urea                                                | 0.016433111 | kg                |
| Urea                                                | 0.002078327 | kg                |
| Urea                                                | 0.014032709 | kg                |
| Packaging film, low density polyethylene            | 0.02        | kg                |
| Packaging, for fertilisers                          | 0.15        | kg                |

|                                                               |             |                |
|---------------------------------------------------------------|-------------|----------------|
| Folding boxboard carton                                       | 0.006       | kg             |
| Packaging film, low density polyethylene                      | 0.005       | kg             |
| Sheet rolling, aluminium                                      | 0.0073      | kg             |
| White lined chipboard carton                                  | 0.08        | kg             |
| Sugar, from sugarcane                                         | 0.278       | kg             |
| Vegetable oil, refined                                        | 0.002       | kg             |
| <b>INPUTS DURING PROCESSING STAGE</b>                         |             |                |
|                                                               |             |                |
| Building, hall, steel construction                            | 4.09E-07    | m <sup>2</sup> |
| Electricity, medium voltage                                   | 0.1614      | kWh            |
| Natural gas liquids                                           | 0.0378      | kg             |
| Water, PE                                                     | 0.0048      | m <sup>3</sup> |
| Wood pellet, measured as dry mass                             | 0.008       | kg             |
| Building, hall, steel construction                            | 4.09E-07    | m <sup>2</sup> |
| Electricity, medium voltage                                   | 0.6497      | kWh            |
| Natural gas liquids                                           | 0.528       | kg             |
| Water, PE                                                     | 0.01397     | m <sup>3</sup> |
| White lined chipboard carton                                  | 0.08        | kg             |
| <b>Transport (Factory and Retail Distribution)</b>            |             |                |
| Transport, freight, lorry, unspecified                        | 299         | kg*km          |
| Transport, freight, sea, container ship                       | 5645.62     | kg*km          |
| Transport, freight, lorry with refrigeration machine, cooling | 432.58      | kg*km          |
| <b>OUTPUTS IN INGREDIENTS PRODUCTION PHASE</b>                |             |                |
| 1.1_INGREDIENTS_DRY_COCOA_BEAN                                | 1           | kg             |
| 1.3_PESTICIDES/FERTILISERS_EMISSIONS                          | 0.367575703 | kg             |
| Waste wood, untreated                                         | 0.005667172 | kg             |
| Waste wood, untreated                                         | 0.045642241 | kg             |
| Waste wood, untreated                                         | 0.003801682 | kg             |
| Waste wood, untreated                                         | 4.14E-04    | kg             |
| Waste wood, untreated                                         | 0.605533392 | kg             |
| Waste wood, untreated                                         | 0.072031509 | kg             |
| Waste wood, untreated                                         | 0.002404733 | kg             |
| Waste wood, untreated                                         | 0.015917376 | kg             |
| Water                                                         | 0.741186553 | m <sup>3</sup> |
| Water                                                         | 0.156310926 | m <sup>3</sup> |
| Water                                                         | 0.625228109 | m <sup>3</sup> |
| 2_PACKAGING_MAT_AUX_TRANSPORT                                 | 1           | kg             |
| Packaging waste, plastic                                      | 0.04        | kg             |
| Packaging waste, plastic                                      | 0.0025      | kg             |
| Aluminium waste                                               | 0.0025      | kg             |
| Carton waste                                                  | 0.0025      | kg             |

| OUTPUTS IN PROCESSING PHASE  |      |    |
|------------------------------|------|----|
| 3.1_COCOA_PASTE_FABRICATION  | 0.6  | kg |
| biowaste                     | 3.28 | kg |
| 3.3_COCOA_BUTTER_FABRICATION | 1    | kg |
| 3_CHOCOLATE_FABRICATION      | 1    | kg |
| 4_TRANSPORT_FOR_DISTRIBUTION | 1    | kg |

**Table S3.** Inputs and outputs for 0.71 kg of cocoa paste input needs.

| Inputs efficiency for cocoa paste |      |        |
|-----------------------------------|------|--------|
| Material                          | Unit | Amount |
| Raw cocoa                         | kg   | 13.05  |
| Dry cocoa beans                   | kg   | 3.51   |
| Polyethylene bags                 | kg   | 0.005  |
| Cardboard                         | kg   | 0.006  |

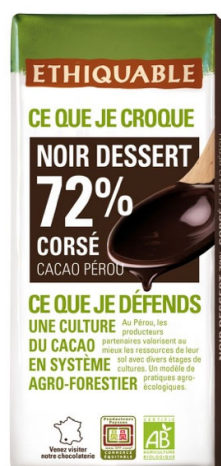

**Figure S1.** Chocolate bar (150 g) from Ethiquable, “Noir dessert corsé 72% de cacao équitable & bio”.



**Table S4.** Ingredients for 1 kg of Organic and Fairtrade (OA&FT) Chocolate (72%).

| 1 kg OA&FT Chocolate recipe (72%) |      |        |
|-----------------------------------|------|--------|
| Ingredient                        | Unit | Amount |
| Cocoa paste                       | kg   | 0.71   |
| Cocoa butter                      | kg   | 0.01   |
| Raw cane sugar                    | kg   | 0.28   |

**Table S5.** Ingredients for 1 kg of Conventional Agriculture (CA) Chocolate (72%)

| 1kg CA Chocolate recipe (72%) |      |        |
|-------------------------------|------|--------|
| Ingredient                    | Unit | Amount |
| Cocoa paste                   | kg   | 0.71   |
| Cocoa butter                  | kg   | 0.01   |
| Cane sugar                    | kg   | 0.278  |
| Vegetable lecithin            | kg   | 0.002  |

**Table S6.** Breakdown of Transport and Packaging results by GWP impact category.

| Transport, Packaging and Auxiliary Material in CA (Scenario 1)    |          |                                                                                                                  |        |           |
|-------------------------------------------------------------------|----------|------------------------------------------------------------------------------------------------------------------|--------|-----------|
| Absolute                                                          | Relative | Process                                                                                                          | Amount | Unit      |
| 2.37%                                                             | 100.00%  | Transport, Packaging and Auxiliary Material in OA&FT (Scenario 1)                                                | 0.187  | kg CO2-Eq |
| 0.81%                                                             | 34.18%   | market for packaging film, low density polyethylene   packaging film, low density polyethylene   Cutoff, U - GLO | 0.064  | kg CO2-Eq |
| 0.74%                                                             | 31.22%   | market for transport, freight, sea, container ship   transport, freight, sea, container ship   Cutoff, U - GLO   | 0.058  | kg CO2-Eq |
| 0.59%                                                             | 24.89%   | market for transport, freight, lorry, unspecified   transport, freight, lorry, unspecified   Cutoff, U - RoW     | 0.047  | kg CO2-Eq |
| 0.23%                                                             | 9.70%    | market for packaging, for fertilisers   packaging, for fertilisers   Cutoff, U - GLO                             | 0.018  | kg CO2-Eq |
| Transport, Packaging and Auxiliary Material in OA&FT (Scenario 2) |          |                                                                                                                  |        |           |
| Absolute                                                          | Relative | Process                                                                                                          | Amount | Unit      |
| 10.85%                                                            | 100.00%  | Transport, Packaging and Auxiliary Material in CA (Scenario 2)                                                   | 0.366  | kg CO2-Eq |
| 3.76%                                                             | 34.65%   | market for white lined chipboard carton   white lined chipboard carton   Cutoff, U - RoW                         | 0.127  | kg CO2-Eq |
| 3.51%                                                             | 32.35%   | market for transport, freight, lorry, unspecified   transport, freight, lorry, unspecified   Cutoff, U - RoW     | 0.119  | kg CO2-Eq |
| 3.06%                                                             | 28.20%   | market for transport, freight, sea, container ship   transport, freight, sea, container ship   Cutoff, U - GLO   | 0.103  | kg CO2-Eq |
| 0.36%                                                             | 3.32%    | market for packaging, for fertilisers   packaging, for fertilisers   Cutoff, U - GLO                             | 0.012  | kg CO2-Eq |
| 0.14%                                                             | 1.29%    | market for sheet rolling, aluminium   sheet rolling, aluminium   Cutoff, U - GLO                                 | 0.005  | kg CO2-Eq |
